# Supplementary material
Source: Springer Nature journal article supplement (https://www.springermedizin.de/resource/supplementary/13052_2009_79_MOESM2_ESM.pdf/9671344)

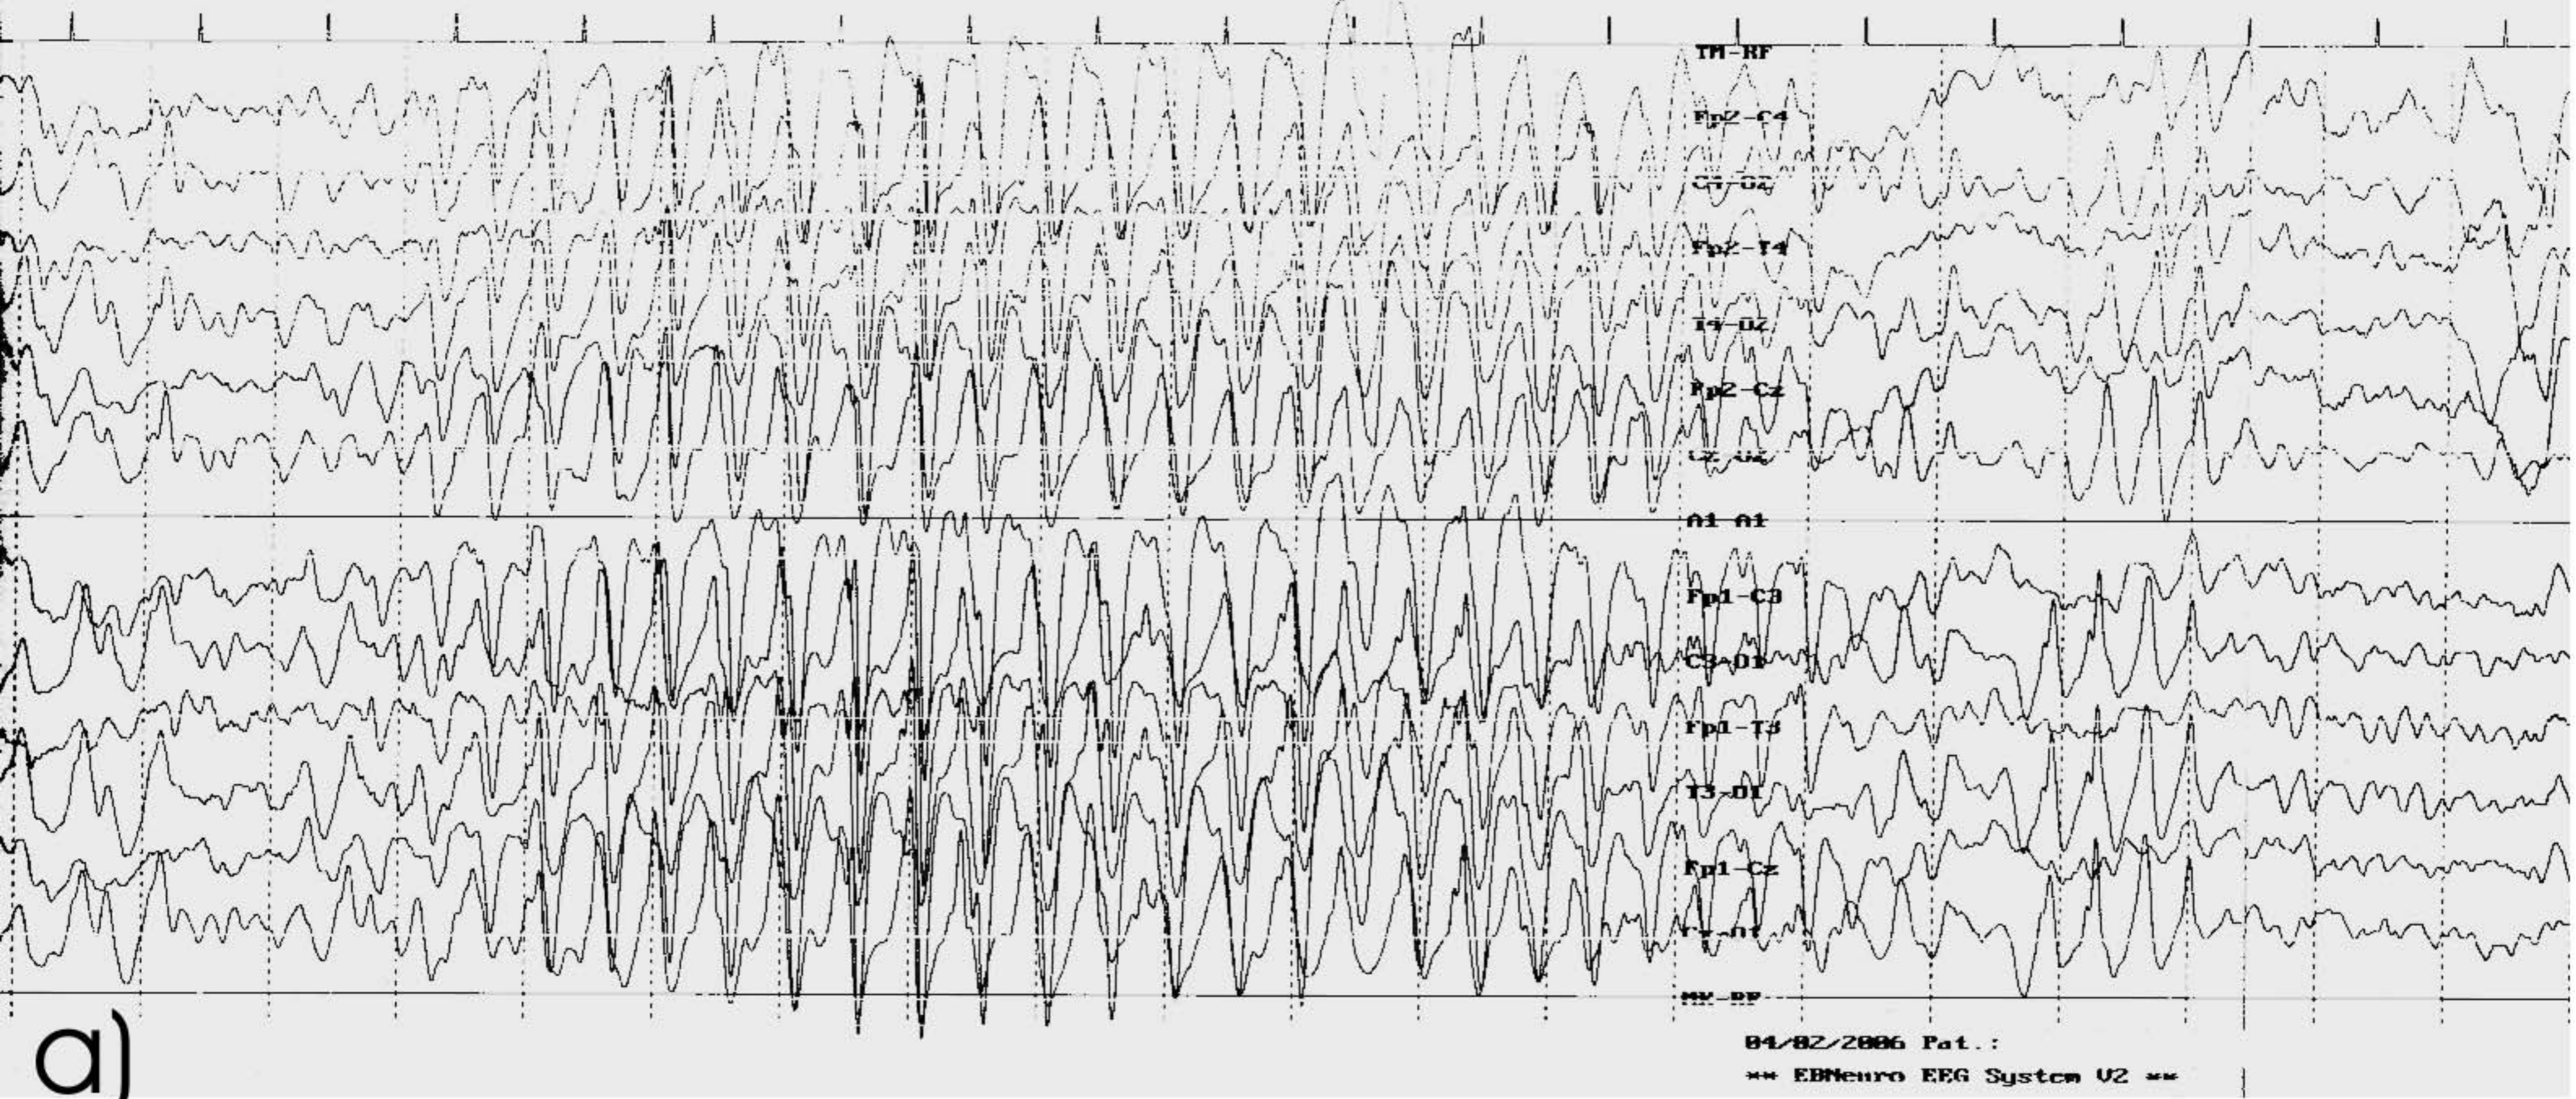

a)

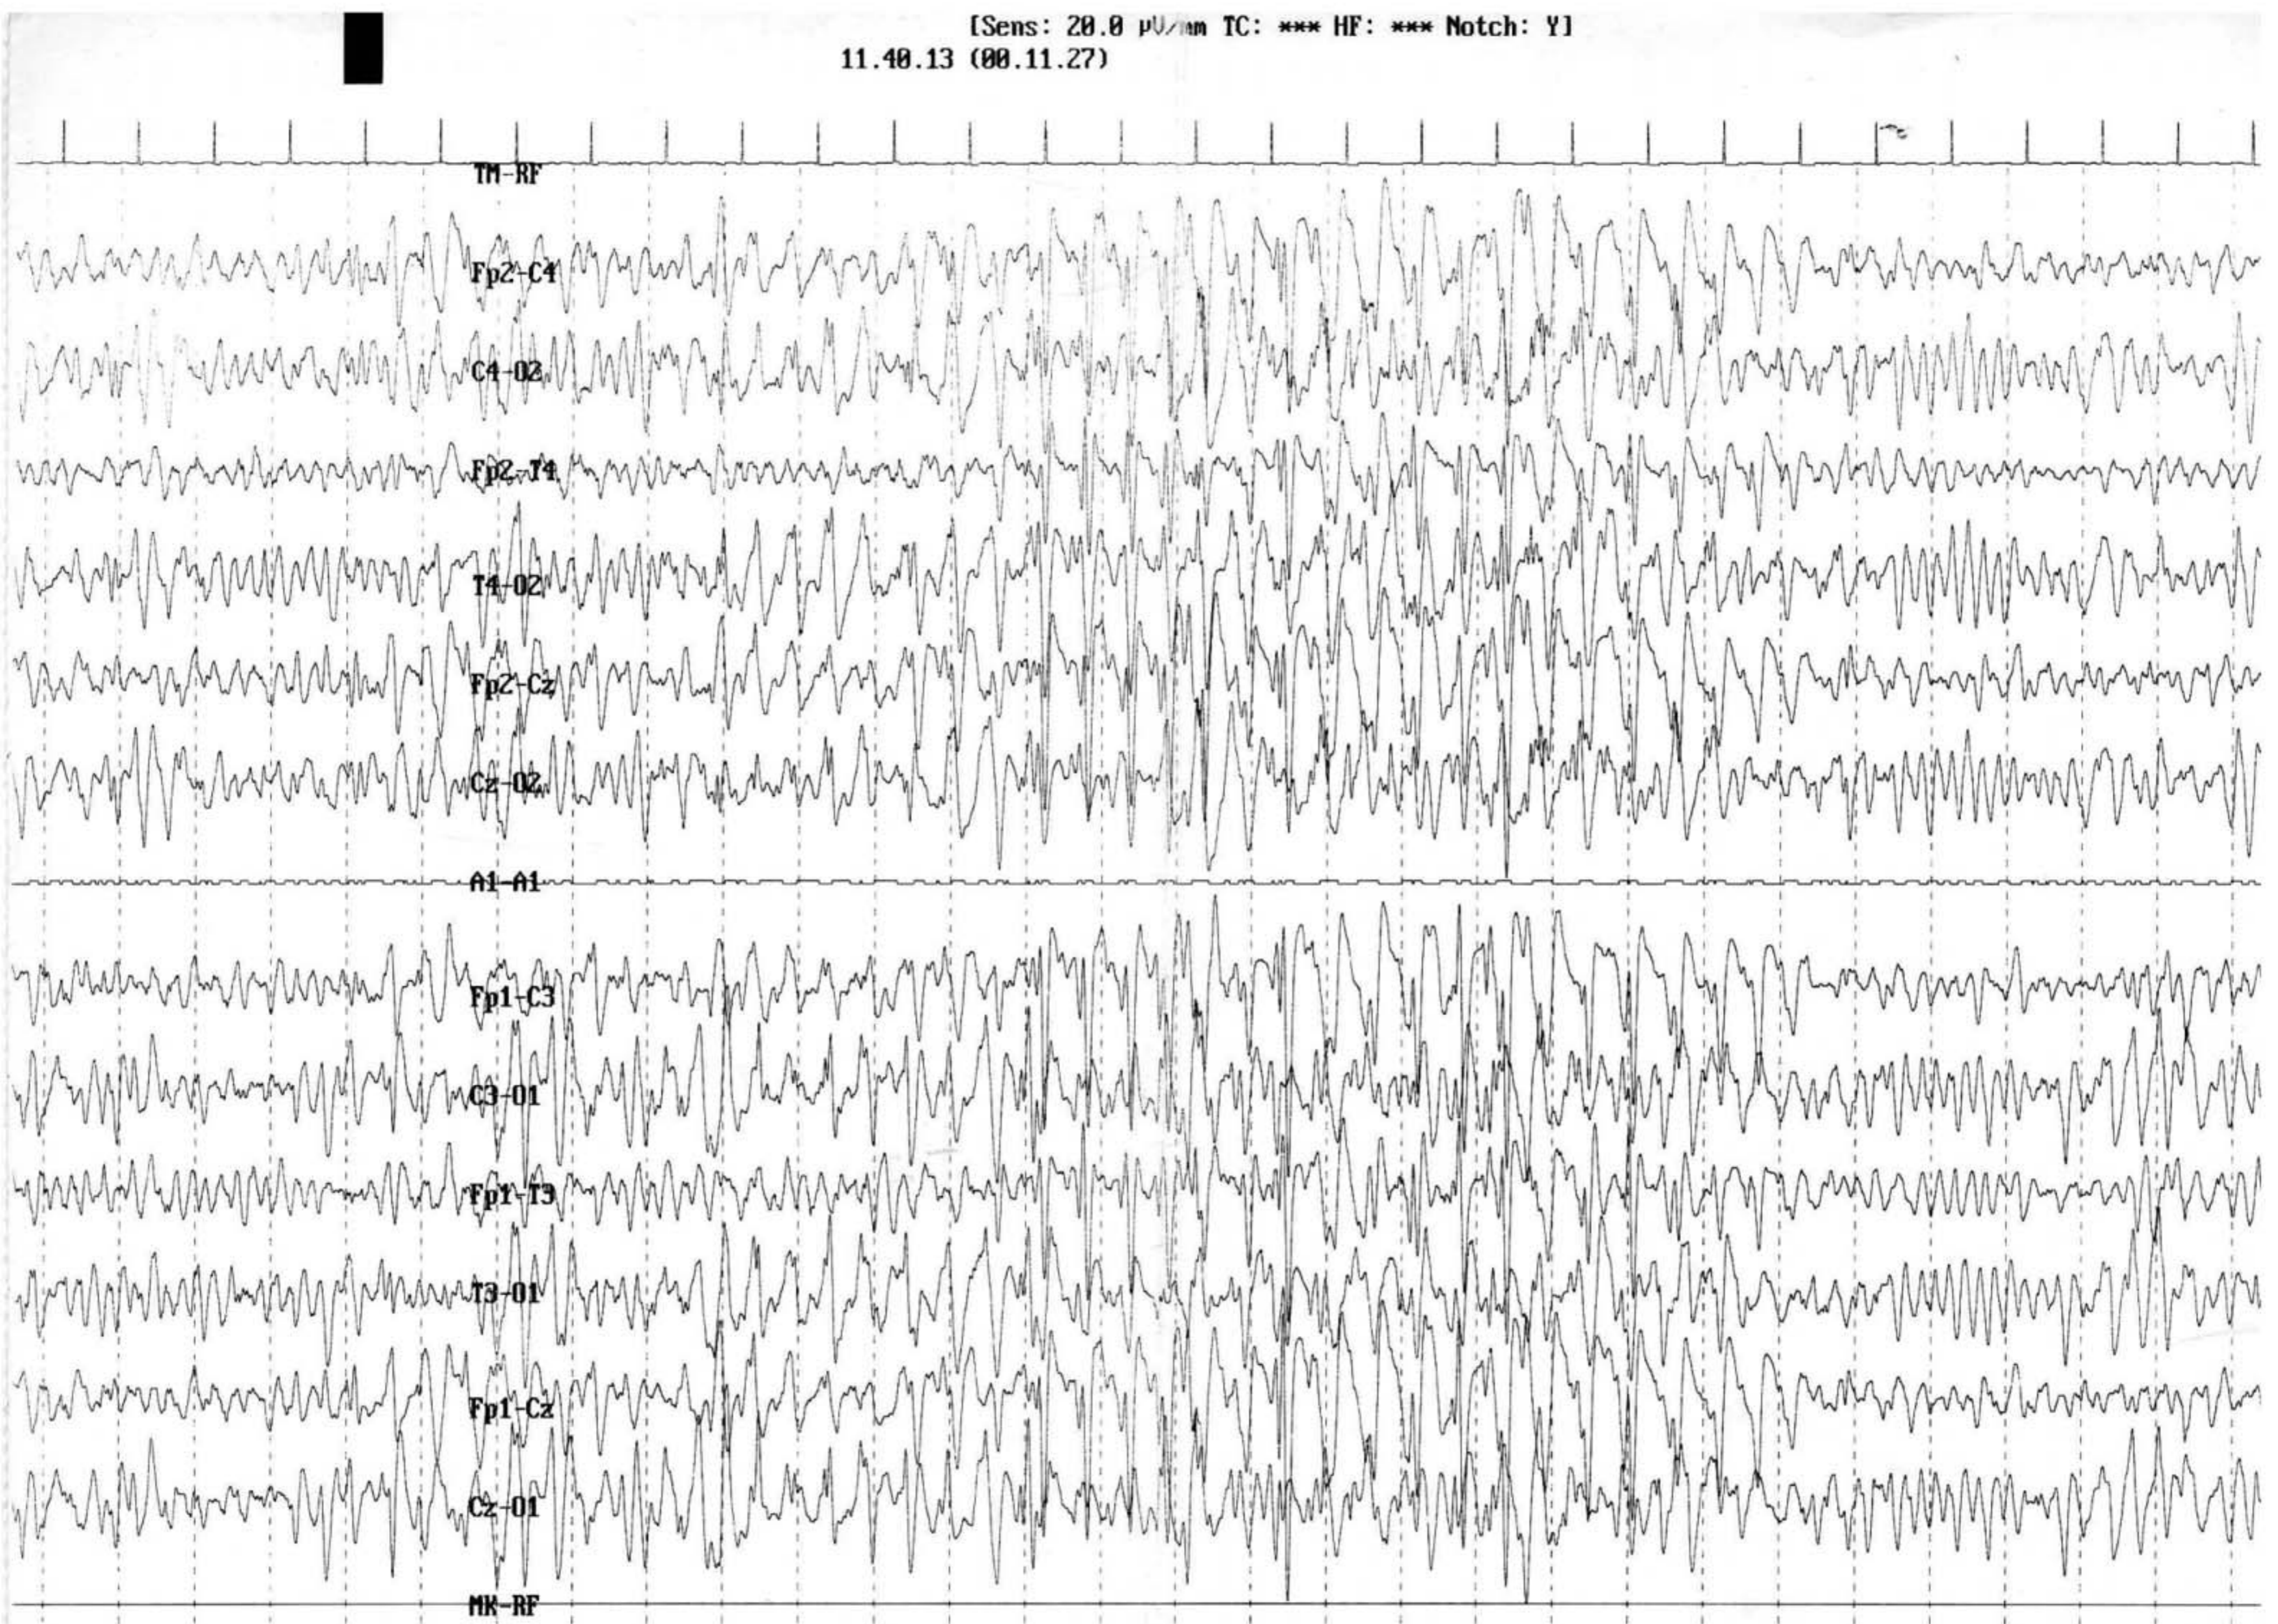

b)

Supplement: MOESM2 [file 9671344]
